# Supplementary material for: Expression of miRNAs in turkey muscle satellite cells and differential response to thermal challenge
Source: Front Physiol. 2023 Nov 23;14:1293264. doi: 10.3389/fphys.2023.1293264 (PMC10701595; doi:10.3389/fphys.2023.1293264)
Supplement: Supplementary file 10 [file Table5.XLSX]

## Sheet: Sheet1
Supplementary Table 5 Differentially expressed miRNAs in differentiating skeletal muscle SCs.1
	miRDeep status	43°C vs 38°C NCT		43°C vs 38°C RBC2		38°C vs 33°C NCT		38°C vs 33°C RBC2			33°C (RBC2 vs NCT)
ID		log2FC	FDR p-value	log2FC	FDR p-value	log2FC	FDR p-value	log2FC	FDR p-value		log2FC	FDR p-value
mga-miR-1a-1-5p	known	0.447	0.814	2.263	0	3.46	0.009	1.961	0		-0.619	0.074
mga-miR-1a-2-5p	known	0.408	0.854	2.084	0	3.51	0.009	2.387	0		-0.839	0
mga-miR-1b-5p	known	-1.258	0.348	0.738	0.029	3.931	0.011	2.421	0		-0.372	0.689
mga-miR-18b-5p	known	-1.005	0.481	-0.857	0.021	-0.3	0.73	-0.144	0.81		-0.124	0.757
mga-miR-19a-5p	known	-0.046	0.98	0.127	0.612	-0.45	0.579	-0.954	0		0.825	0.002
mga-miR-19b-3p	known	-0.047	0.98	0.059	0.85	-0.16	0.937	-0.415	0.043		0.367	0.01
mga-miR-19b-5p	known	0.008	0.998	0.138	0.604	-0.076	0.975	-0.553	0.004		0.521	0.003
mga-miR-20a-5p	known	-0.676	0.682	0.226	0.604	0.171	0.975	-0.736	0.047		0.73	0.07
mga-miR-21-5p	known	-0.689	0.659	-0.019	0.948	0.527	0.562	-0.142	0.404		0.546	0.003
mga-miR-22-5p	known	-0.656	0.682	-0.063	0.843	0.084	0.975	-0.098	0.809		0.444	0.018
mga-miR-23b-5p	known	0.474	0.814	0.081	0.73	0.325	0.648	0.452	0		-0.12	0.163
mga-miR-26a-5p	known	-0.176	0.962	-0.69	0.021	-0.965	0.162	-0.567	0.019		-0.176	0.43
mga-miR-29a-5p	known	-1.139	0.441	-0.986	0.005	-0.214	0.937	-0.069	0.917		0.537	0.044
mga-miR-29b-1-5p	known	-0.294	0.892	-1.093	0.003	-0.694	0.519	-0.472	0.109		0.329	0.133
mga-miR-29b-2-5p	known	-0.308	0.888	-0.649	0.021	-0.106	0.957	-0.106	0.824		0.839	0.003
mga-miR-29c-5p	known	-0.99	0.481	-0.969	0.01	-0.259	0.874	0.025	0.956		0.556	0.005
mga-miR-30a-5p	known	-0.355	0.858	-0.519	0.041	0.082	0.975	0.178	0.57		-0.015	0.945
mga-miR-30b-5p	known	-0.212	0.957	-0.865	0.046	-0.836	0.373	0.03	0.964		-0.27	0.539
mga-miR-30e-5p	known	-0.166	0.97	-0.541	0.03	0.081	0.975	0.064	0.879		0.005	0.969
mga-miR-32-3p	known	-0.451	0.856	-1.374	0.037	0.561	0.735	0.007	0.99		0.33	0.756
mga-miR-34a-5p	known	0.296	0.892	0.388	0.195	-0.102	0.981	0.014	0.967		0.762	0.005
mga-miR-92-3p	known	0.579	0.716	-0.665	0.041	-0.559	0.524	0.037	0.956		-0.127	0.72
mga-miR-100-5p	known	-0.49	0.809	-0.551	0.032	-0.464	0.524	-0.222	0.407		0.45	0.012
mga-miR-125b-5p	known	-0.402	0.856	-0.075	0.758	-0.238	0.675	0.053	0.879		0.178	0.044
mga-miR-129-5p	known	0.562	0.814	1.166	0.021	0.043	0.981	-0.125	0.929		0.738	0.325
mga-miR-133a-3p	known	0.046	0.98	1.184	0.022	0.977	0.524	0.715	0.407		-0.834	0.325
mga-miR-138-5p	known	0.847	0.589	1.159	0.021	-0.158	0.975	-0.1	0.94		-0.622	0.321
mga-miR-138-5p	known	0.255	0.962	1.605	0.024	-0.095	0.981	0.514	0.809		-1.474	0.216
mga-miR-143-5p	known	0.544	0.761	0.641	0.01	-0.261	0.751	-0.263	0.167		0.75	0
mga-miR-145-5p	known	0.408	0.854	0.522	0.021	-0.452	0.524	-0.084	0.809		0.48	0.005
mga-miR-146b-5p	known	-0.896	0.532	-0.44	0.047	0.14	0.937	-0.004	0.99		-0.082	0.52
mga-miR-181a-5p	known	0.605	0.698	0.492	0.083	0.205	0.946	0.374	0.176		-0.513	0.024
mga-miR-184-5p	known	0.127	0.97	0.61	0.021	0.391	0.579	0.527	0.004		-0.823	0
mga-miR-187-3p	known	-1.929	0.158	-0.554	0.356	1.635	0.249	2.126	0.007		-1.511	0.163
mga-miR-187-5p	known	-1.929	0.158	-0.554	0.356	1.635	0.249	2.126	0.007		-1.511	0.163
mga-miR-190a-5p	known	0.086	0.974	0.878	0.03	0.381	0.744	0.01	0.99		-0.056	0.907
mga-miR-205b	known	3.702	0.132	6.981	0.001	2.289	0.727	-2.524	0.423		2.237	0.554
mga-miR-206	known	-0.105	0.97	0.19	0.364	0.768	0.242	1.051	0		-1.25	0
mga-miR-210a-3p	known	0.877	0.532	0.913	0.005	0.396	0.717	0.521	0.005		-0.47	0.006
mga-miR-214	known	0.88	0.532	0.196	0.418	0.298	0.689	0.356	0.068		-0.375	0.016
mga-miR-214b-5p	known	1.337	0.329	0.629	0.037	-0.316	0.717	-0.252	0.567		-0.115	0.757
mga-miR-301a-5p	known	1.171	0.441	-0.05	0.904	-0.073	0.975	0.45	0.047		-0.506	0.006
mga-miR-454-5p	known	0.221	0.936	-0.042	0.867	0.023	0.981	-0.041	0.934		0.239	0.033
mga-miR-455-5p	known	0.971	0.492	0.418	0.064	-0.819	0.162	-0.741	0		0.676	0.001
mga-miR-458a-3p	known	-0.58	0.716	-0.68	0.021	0.155	0.901	0.235	0.439		-0.352	0.053
mga-miR-458a-5p	known	-0.582	0.716	-0.689	0.021	0.142	0.928	0.244	0.423		-0.367	0.05
mga-miR-460b-5p	known	-1.421	0.441	-2.246	0.005	0.066	0.981	0.709	0.322		0.135	0.919
mga-miR-1306-5p	known	0.816	0.589	0.176	0.663	0.11	0.975	1.296	0.001		-0.768	0.139
mga-miR-1416-5p	known	-1.365	0.348	-0.904	0.003	0.47	0.524	0.773	0		-1.113	0
mga-miR-1456-5p	known	-0.344	0.888	-1.007	0.043	-0.442	0.82	0.755	0.147		-1.217	0.077
mga-miR-1559-5p	known	-2.443	0.045	-1.211	0.006	-0.014	0.986	-0.762	0.025		0.515	0.133
mga-miR-1676-5p	known	-0.674	0.732	0.047	0.948	1.172	0.562	1.99	0.009		-0.901	0.43
mga-miR-1676-5p	known	0.301	0.909	0.129	0.853	1.226	0.524	1.911	0.004		-0.484	0.72
mga-miR-1677-5p	known	-1.657	0.441	-0.327	0.523	0.193	0.975	-0.593	0.356		1.872	0.024
mga-miR-1677-5p	known	-1.657	0.441	-0.327	0.523	0.193	0.975	-0.593	0.356		1.872	0.024
mga-miR-2131-5p	known	-1.043	0.589	-1.323	0.037	-0.204	0.975	0.642	0.51		-1.149	0.21
mga-miR-2184a-5p	known	0.841	0.647	-1.301	0.044	-0.057	0.981	-0.041	0.967		0.174	0.865
mga-miR-2188-5p	known	0.078	0.98	2.224	0.015	1.58	0.579	1.884	0.354		-1.006	0.72
mga-miR-2954	known	-0.08	0.974	-0.401	0.051	0.045	0.981	0.499	0		-1.044	0
mga-miR-2954	known	-0.072	0.974	-0.387	0.058	0.036	0.981	0.472	0		-1.037	0
mga-miR-3523	known	0.732	0.659	0.966	0.036	0.8	0.583	1.226	0.06		-0.976	0.181
mga-miR-3529	known	0.908	0.492	0.961	0.006	0.252	0.825	0.269	0.494		0.125	0.72
mga-miR-3530-5p	known	0.417	0.819	0.647	0.03	1.251	0.228	1.427	0		-0.906	0.011
mga-miR-N24	novel	0.066	0.974	1.63	0.003	1.281	0.249	-0.465	0.354		0.032	0.953
mga-miR-N29	novel	-5.017	0	-0.085	0.948	3.456	0.242	4.835	0.024		-4.183	0.133
mga-miR-N30	novel	-1.904	0.158	4.174	0.001	5.262	0.036	-0.834	0.69		1.582	0.444
mga-miR-N32	novel	-0.813	0.589	-1.196	0.021	0.53	0.682	0.255	0.736		-0.353	0.624
mga-miR-N34	novel	2.226	0.158	2.12	0.021	2.454	0.524	1.92	0.337		-0.17	0.953
mga-miR-N40	novel	0.402	0.888	-1.506	0.022	-0.671	0.77	-0.48	0.572		0.47	0.624
mga-miR-N53	novel	-1.453	0.402	-1.277	0.024	-0.428	0.735	0.247	0.809		-1.103	0.122
mga-miR-N54	novel	-1.257	0.589	-3.191	0.001	-1.651	0.249	-1.011	0.079		0.344	0.702
mga-miR-N56	novel	-1.664	0.158	-1.833	0.002	-0.482	0.524	-1.462	0		-0.403	0.158
mga-miR-N57	novel	-1.592	0.161	-1.204	0.01	0.21	0.937	-0.797	0.014		-0.433	0.122
mga-miR-N63	novel	-1.325	0.441	0.08	0.912	-0.355	0.751	0.61	0.429		-1.809	0.018
mga-miR-N68	novel	-1.328	0.814	1.125	0.612	-1.336	0.826	-3.179	0.048		0.481	0.817
mga-miR-N72	novel	-2.726	0.329	-1.541	0.051	1.556	0.524	-0.396	0.723		2.689	0.05
mga-miR-N79	novel	1.08	0.441	0.879	0.021	1.125	0.373	1.518	0		-0.389	0.558
mga-miR-N92	novel	-0.387	0.888	-1.5	0.025	0.104	0.975	-0.21	0.825		1.027	0.131
mga-miR-N95	novel	0.104	0.97	-0.481	0.373	0.848	0.572	1.205	0.03		-0.311	0.728
mga-miR-N98	novel	0.143	0.97	-1.224	0.03	1.469	0.648	1.644	0.015		-0.073	0.969
mga-miR-N102	novel	1.638	0.201	2.591	0.002	1.751	0.298	2.892	0.036		-2.91	0.072
mga-miR-N105	novel	6.222	0.045	1.97	0.019	-3.22	0.648	-0.121	0.961		0.702	0.789
mga-miR-N140	novel	2.616	0.017	0.827	0.004	1.47	0.036	1.368	0		0.882	0
mga-miR-N157	novel	-2.186	0.05	-2.075	0.001	-0.112	0.975	-0.739	0.025		0.071	0.83
mga-miR-N165	novel	1.598	0.441	3.018	0.005	1.979	0.58	-0.428	0.92		0.684	0.789
mga-miR-N166	novel	2.347	0.312	2.039	0.021	0.445	0.975	-0.062	0.986		0.345	0.871
mga-miR-N167	novel	1.241	0.473	-0.206	0.758	1.019	0.717	1.991	0.016		-0.422	0.793
mga-miR-N172	novel	-1.054	0.82	1.905	0.021	-0.485	0.946	0.264	0.94		-0.594	0.789
mga-miR-N181	novel	5.764	0.098	3.385	0.022	-3.751	0.524	-1.82	0.429		-0.153	0.953
mga-miR-N183	novel	2.124	0.045	0.656	0.03	1.916	0.023	2.182	0		-0.032	0.942
mga-miR-N184	novel	-0.626	0.685	-1.267	0.006	-0.09	0.975	-0.805	0.019		-0.939	0.01
mga-miR-N185	novel	1.195	0.41	1.134	0.006	0.758	0.524	0.092	0.92		-0.096	0.839
1Comparisons with |Log2FC|> 1.0 and FDR p < 0.05 are indicated by color: red denotes up regulated miRNA and green down regulated.
